# Supplementary material
Source: HighWire-hosted journal article supplement (https://cmaj.ca/highwire/filestream/59466/field_highwire_adjunct_files/1/150391-guide-2-at.pdf)

**Appendix 2 (as supplied by the authors): Age-based algorithm for reducing vaccination pain in children**

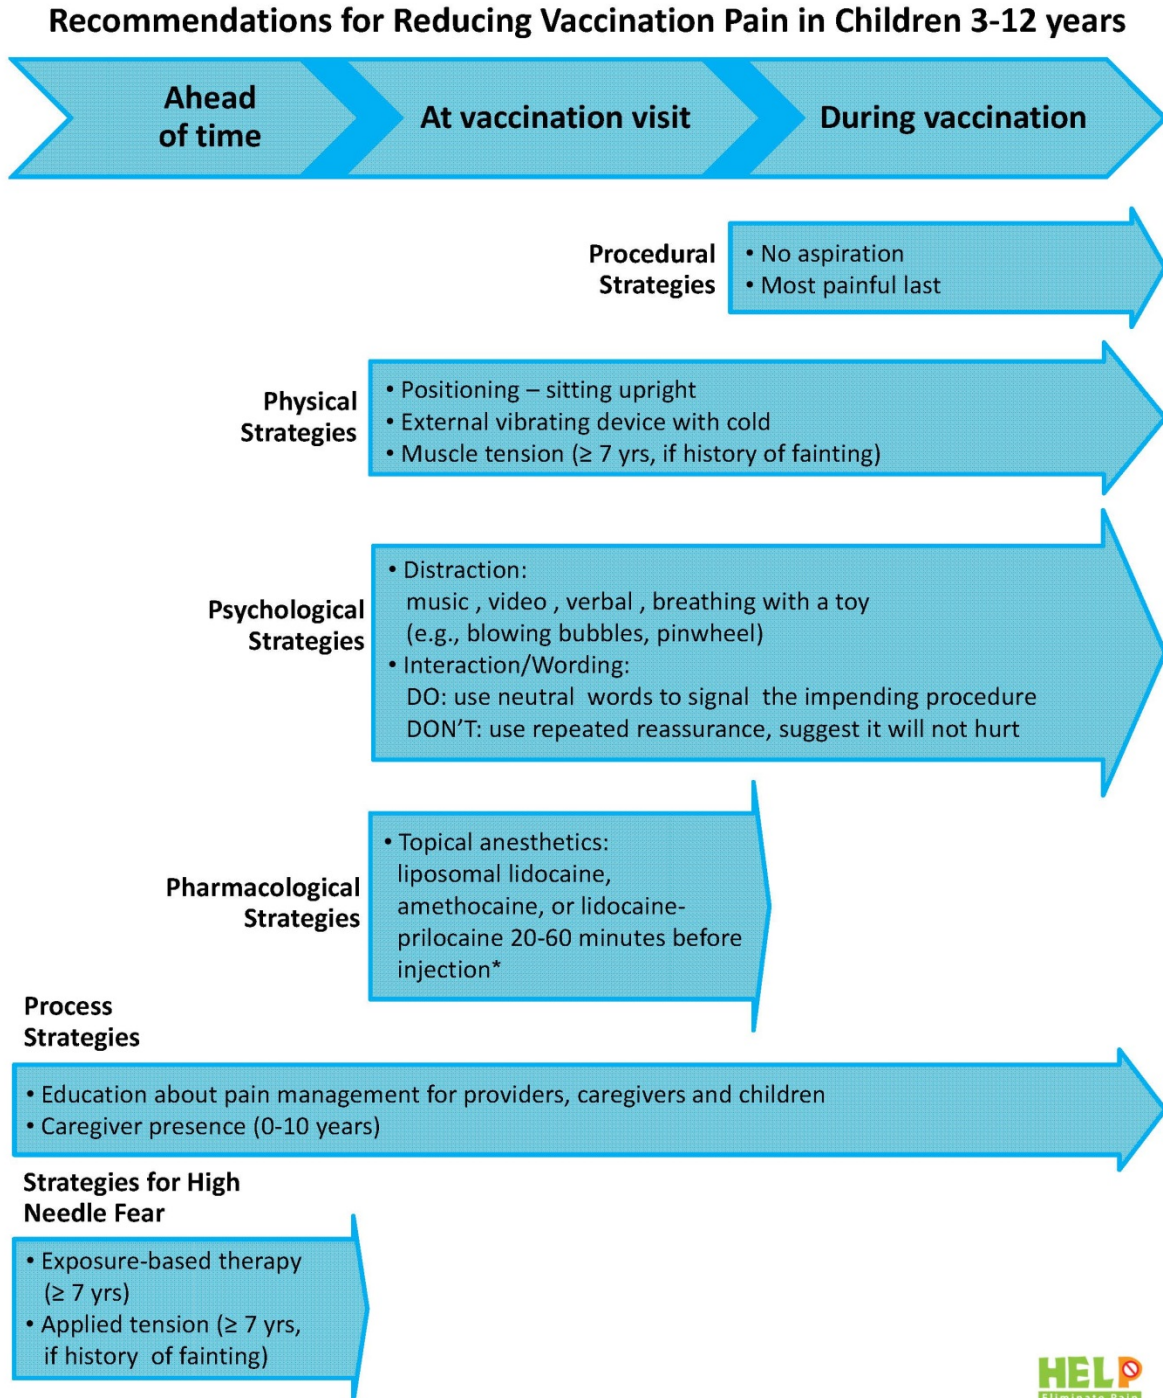

\* Check product monograph

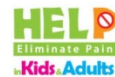

Supplement: 150391-guide-2-at.pdf [file 150391-guide-2-at.pdf]
